# Supplementary material
Source: MDPI journal article supplement (https://www.mdpi.com/1999-4907/9/1/37)

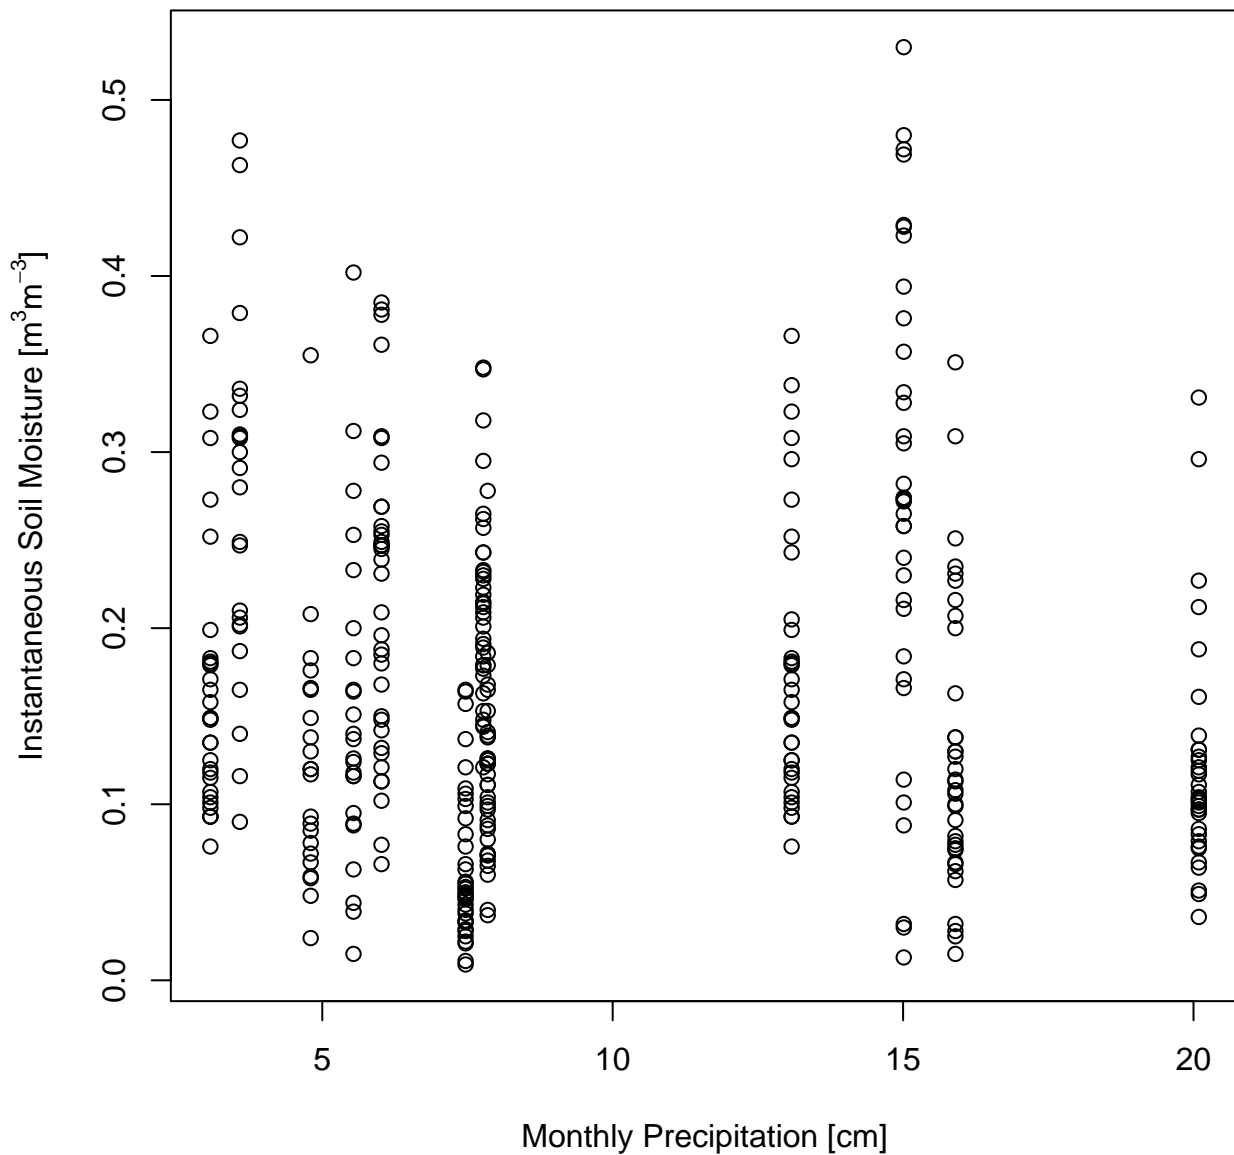

Supplement: s1 [file s1]

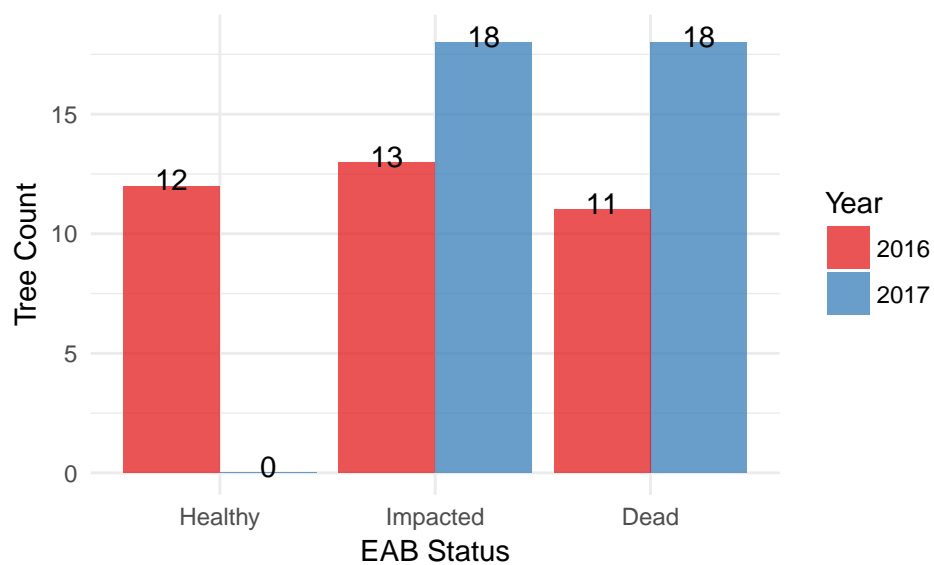

Supplement: s1 [file s1]

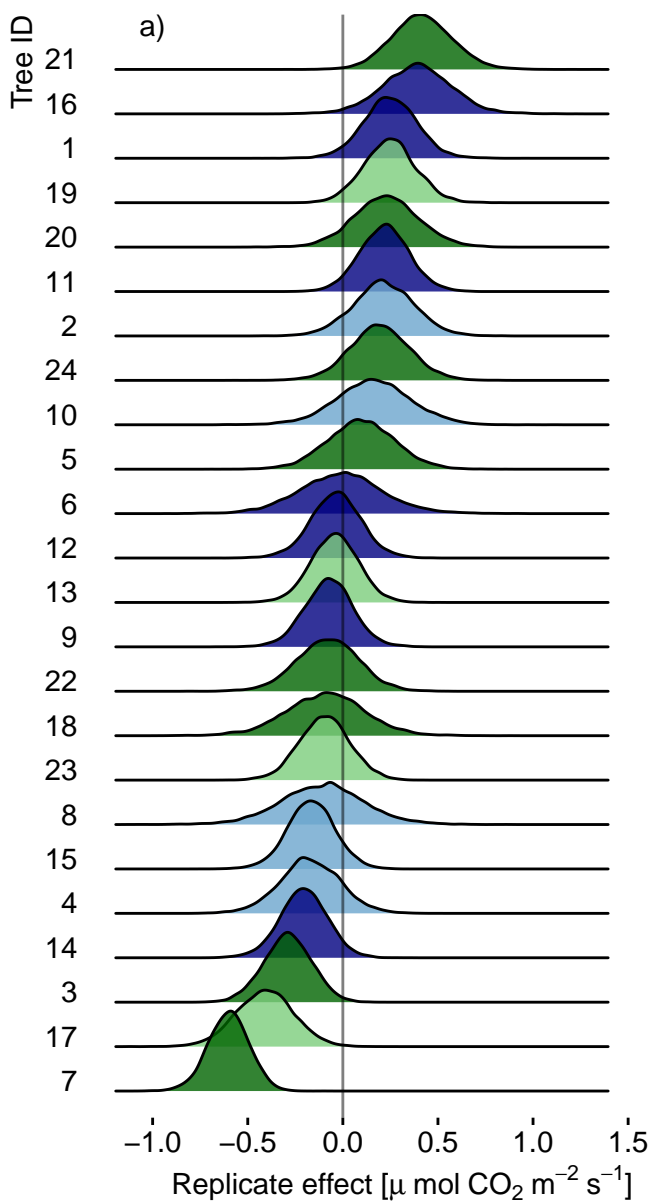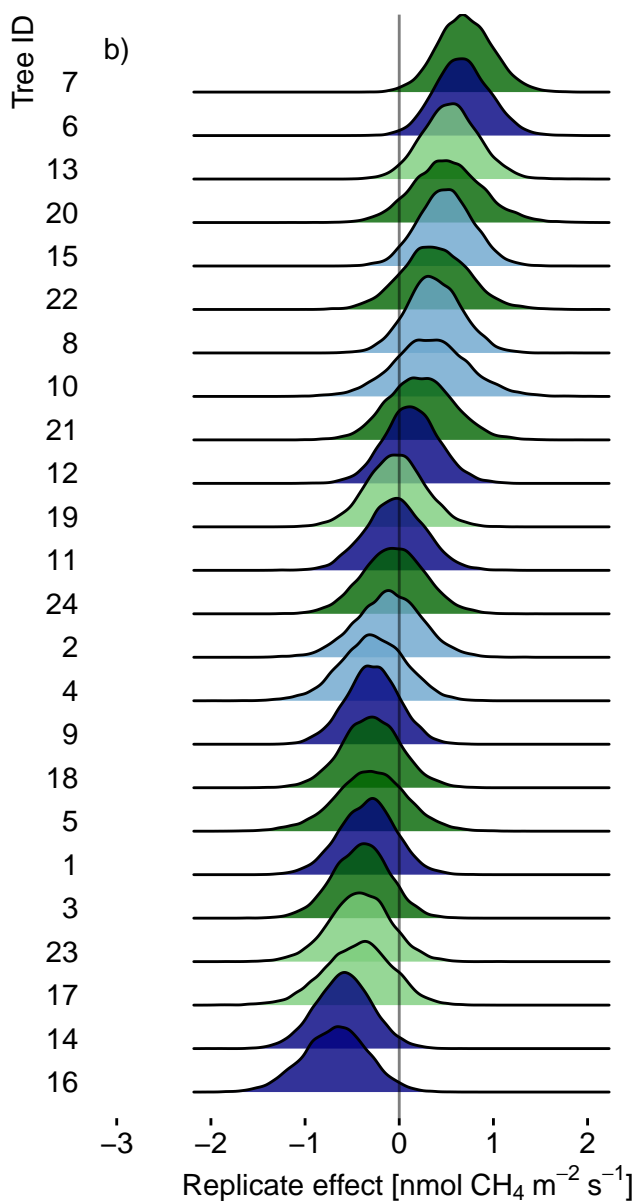

Supplement: s1 [file s1]

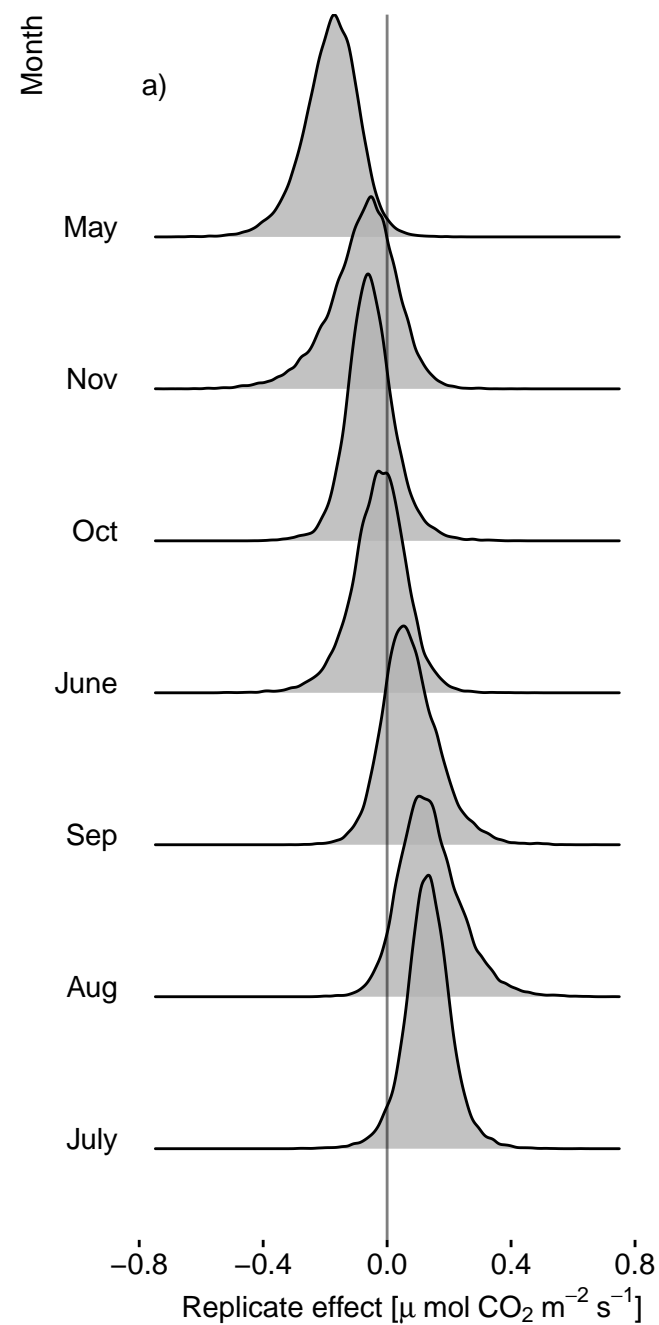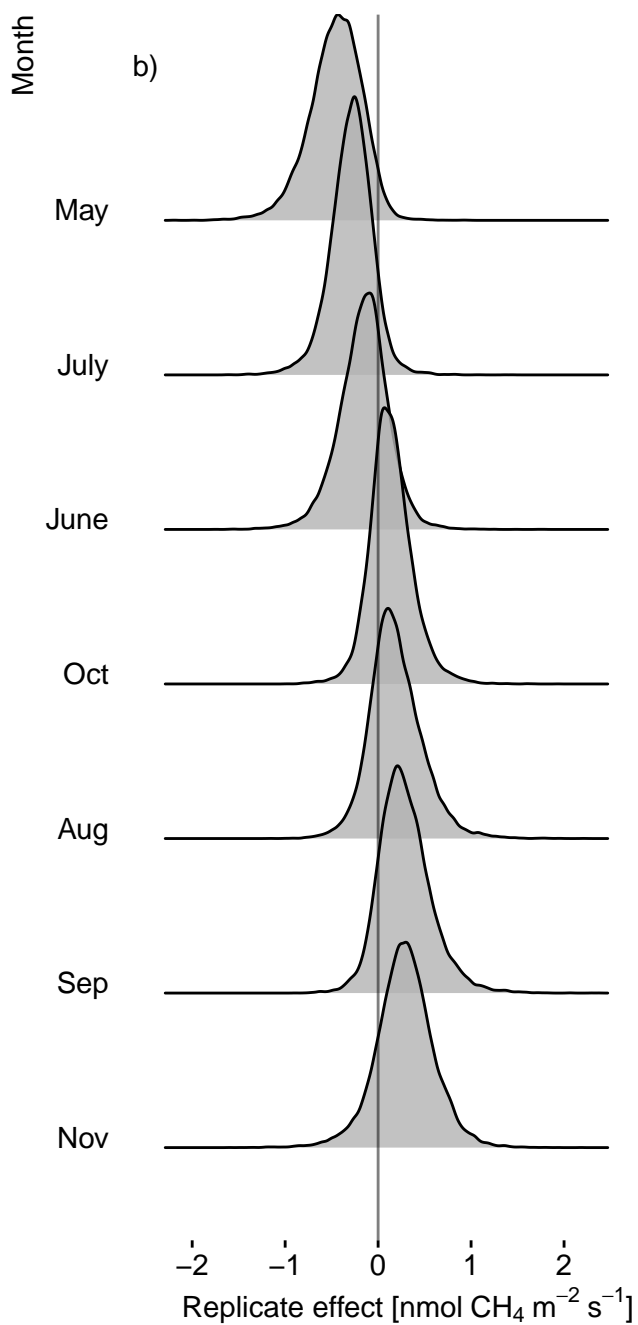

Supplement: s1 [file s1]

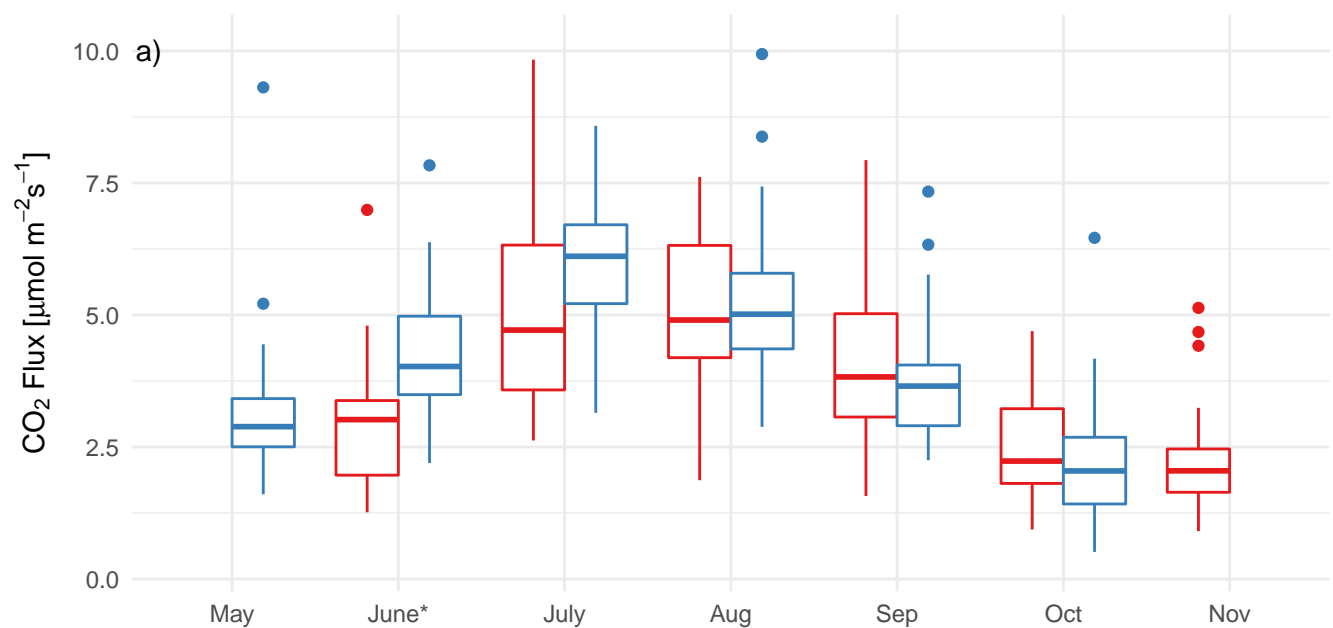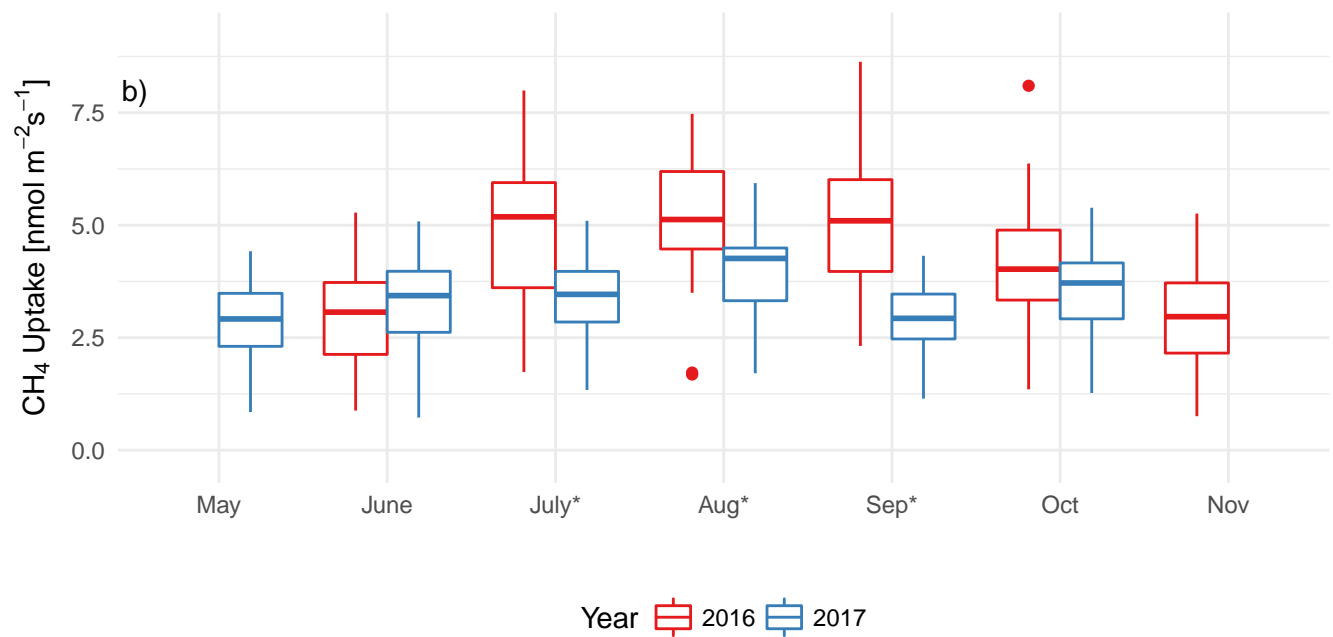

Supplement: s1 [file s1]

Modeled flux [ $\mu\text{ mol CO}_2\text{ m}^{-2}\text{ s}^{-1}$ ]

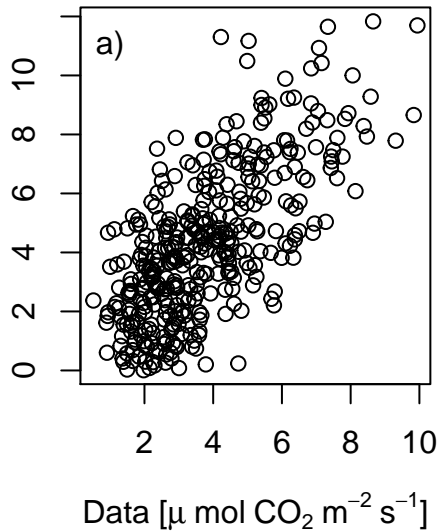

Modeled flux [ $\text{nmol CH}_4\text{ m}^{-2}\text{ s}^{-1}$ ]

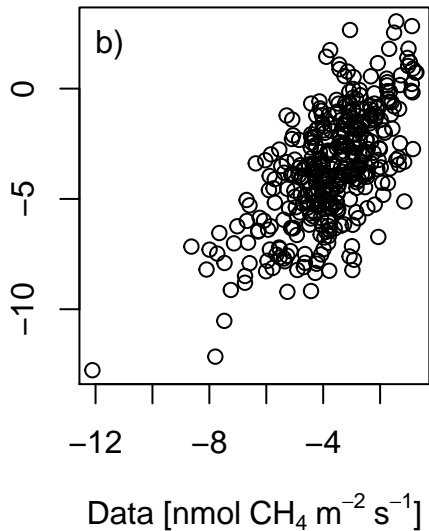

Supplement: s1 [file s1]

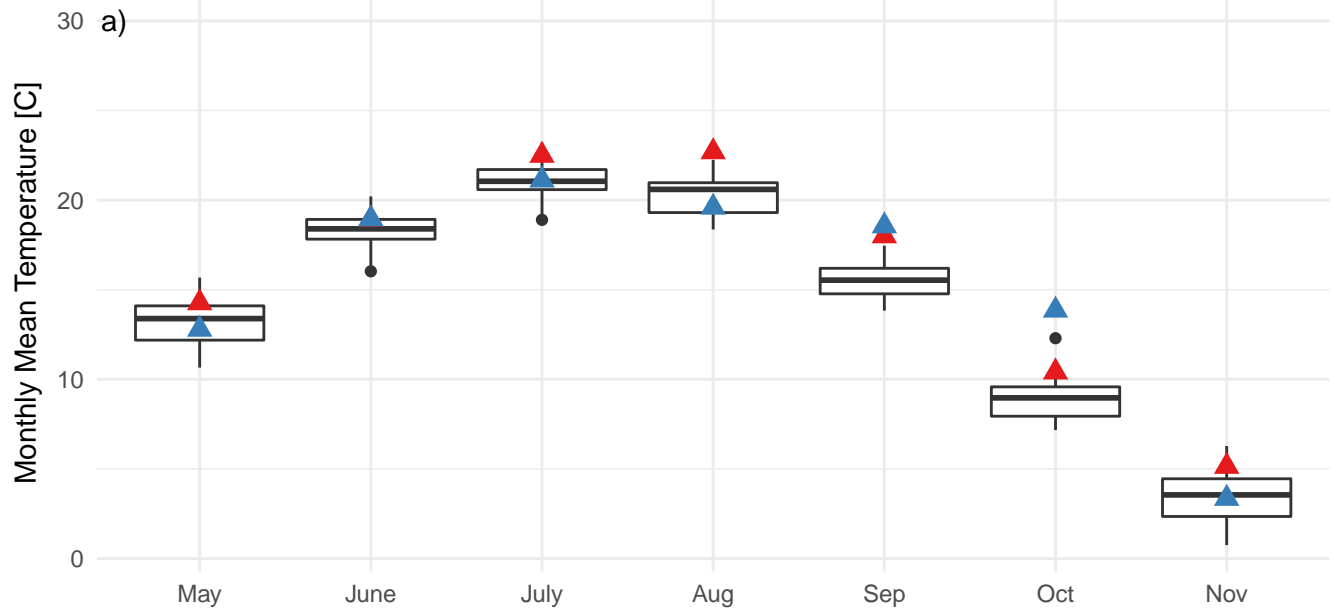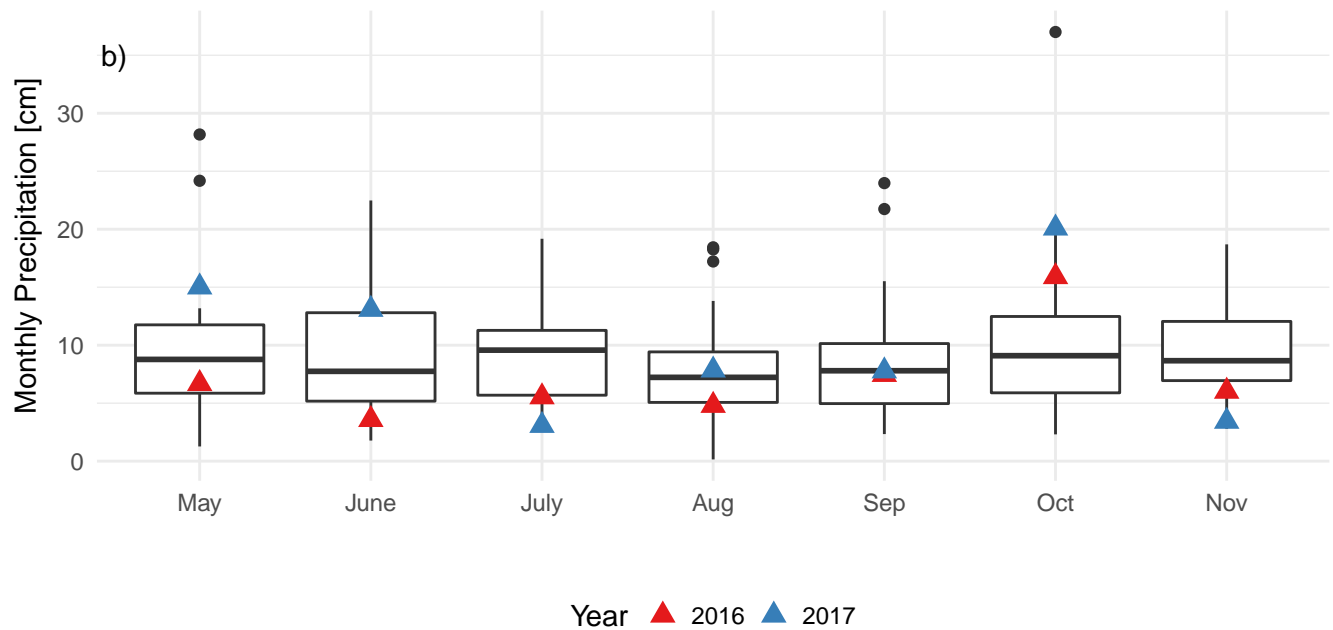

Supplement: s1 [file s1]

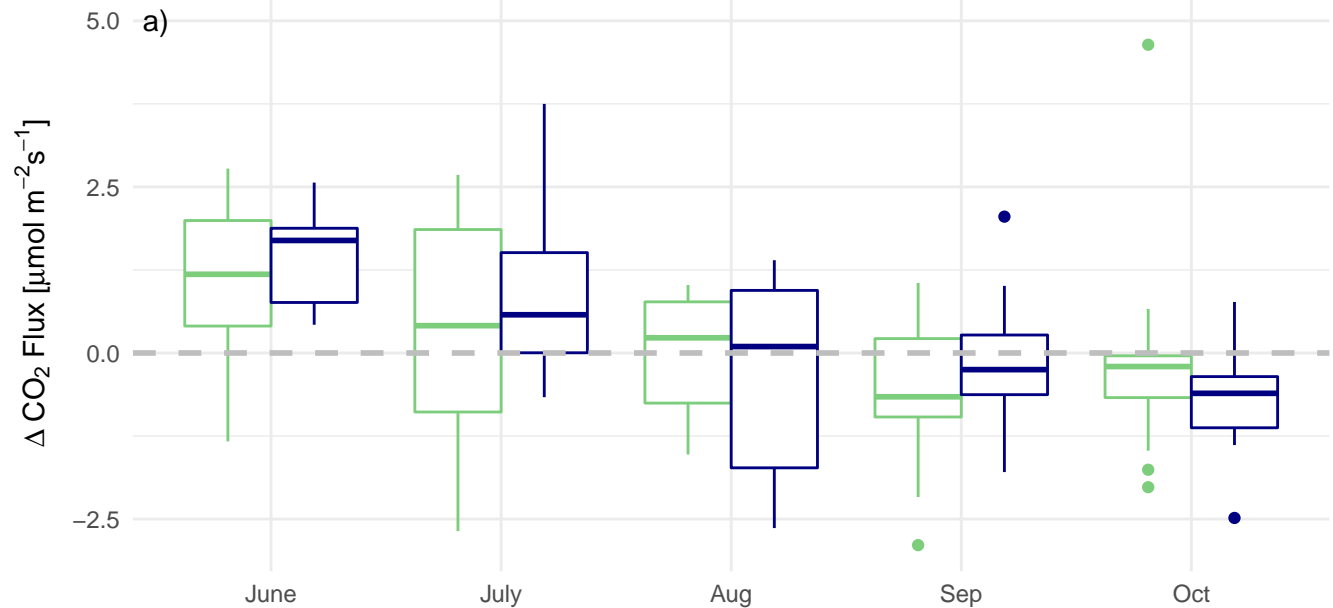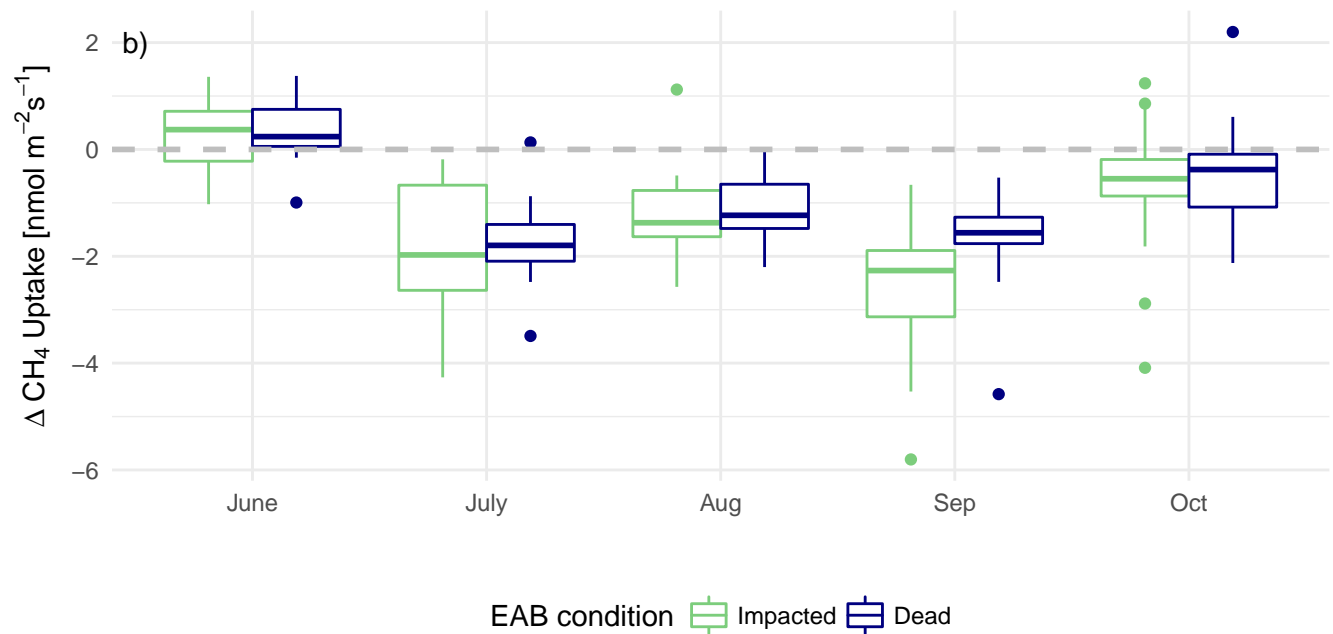

Supplement: s1 [file s1]
